# Supplementary material for: It takes Two: Discovery of Spider Pax2 Duplicates Indicates Prominent Role in Chelicerate Central Nervous System, Eye, as Well as External Sense Organ Precursor Formation and Diversification After Neo- and Subfunctionalization
Source: Frontiers journal article supplement (doi:10.3389/fevo.2022.810077), 2022-02-17
Supplement: Table_2.XLSX [file Table_2.XLSX]

## Sheet: PAX148
Gene Identity	Name	Accession number/Transcript ID	Full Species Name	Short Code	Systematic Classification	Source
?	Smim_Pax7_KFM81055.1	KFM81055.1	Stegodyphus mimosarum	Smim	Arthropoda, Chelicerata, Araneae, Entelegynae	NCBI
Pax1/9_Pox meso	Agen_TRINITY_DN10662_c0_g1_i1	TRINITY_DN10662_c0_g1	Acanthoscurria geniculata	Agen	Arthropoda, Chelicerata, Araneae, Mygalomorphae	Local BLAST | (Pechmann 2020)
Pax1/9_Pox meso	Cgig_CGI_10005222	CGI_10005222	Crassostrea gigas	Cgig	Mollusca, Bivalvia	Local BLAST | http://mgbase.qnlm.ac/page/download/download (Liu et al., 2021)
Pax1/9_Pox meso	CSCU018567_PA	CSCU018567-PA | LOC111637929	Centruroides sculpturatus	Cscu	Arthropoda, Chelicerata, Scorpiones	i5k | Protein - Centruroides sculpturatus Maker proteins v0.5.3 (BCM) (Schwager et al. 2017)
Pax1/9_Pox meso	Dmel_Poxmeso	P23757	Drosophila melanogaster	Dmel	Arthropoda, Insecta, Diptera	Flybase & Uniprot
Pax1/9_Pox meso	Drer_Pax1	XP_700877.6	Danio rerio	Drer	Chordata, Vertebrata, Actinopterygii	NCBI
Pax1/9_Pox meso	Drer_Pax1A	NP_001074061.1	Danio rerio	Drer	Chordata, Vertebrata, Actinopterygii	NCBI
Pax1/9_Pox meso	Drer_Pax9	XP_005158890.1	Danio rerio	Drer	Chordata, Vertebrata, Actinopterygii	NCBI
Pax1/9_Pox meso	Dsil_comp39313	comp39313_1	Dysdera silvatica	Dsil	Arthropoda, Chelicerata, Araneae, Haplogynae	Local BLAST | Vizueta et al., 2017
Pax1/9_Pox meso	Ekan_c189040_g1_i1	c189040_g1_i1	Euperipatoides kanangrensis	Ekan	Onychophora	Local BLAST | R. Janssen Transcriptome
Pax1/9_Pox meso	Erow_Pox_meso	AJG44466.1	Euperipatoides rowelli	Erow	Onychophora	NCBI
Pax1/9_Pox meso	Gmar_c58484_g13_i1	c58484_g13_i1	Glomeris marginata	Gmar	Arthropoda, Myriapoda, Diplopoda	Local BLAST | R. Janssen Transcriptome
Pax1/9_Pox meso	Lgig_XP_009055713.1	XP_009055713.1	Lottia gigantea	Lgig	Mollusca, Gastropoda	Local BLAST | http://mgbase.qnlm.ac/page/download/download (Liu et al., 2021)
Pax1/9_Pox meso	LHES016712_PA	LHES016712-PA	Latrodectus hesperus	Lhes	Arthropoda, Chelicerata, Araneae, Entelegynae	i5k | Protein - LHES_new_ids.faa
Pax1/9_Pox meso	LREC005428_PA	LREC005428-PA	Loxosceles reclusa	Lrec	Arthropoda, Chelicerata, Araneae, Haplogynae	i5k | Protein - LREC_new_ids.faa
Pax1/9_Pox meso	Mmar_MMa06178	MMa06178	Mesobuthus martensii	Mmar	Arthropoda, Chelicerata, Scorpiones	Local BLAST | (Cao et al. 2013)
Pax1/9_Pox meso	Mmar_MMa29290	MMa29290	Mesobuthus martensii	Mmar	Arthropoda, Chelicerata, Scorpiones	Local BLAST | (Cao et al. 2013)
Pax1/9_Pox meso	Mmus_Pax1	AAA39888.1	Mus musculus	Mmus	Chordata, Vertebrata, Mammalia	NCBI
Pax1/9_Pox meso	Mmus_Pax9	NP_035171.1	Mus musculus	Mmus	Chordata, Vertebrata, Mammalia	NCBI
Pax1/9_Pox meso	OFAS014750_PA	OFAS014750-PA	Oncopeltus fasciatus	Ofas	Arthropoda, Insecta, Hemiptera	i5k | Protein - Oncopeltus fasciatus OGSv1.2, peptides
Pax1/9_Pox meso	Pdum15457	gnl|Pdu_trscr_assembly_1|15457;-0F	Platynereis dumerilii	Pdum	Annelida	Local BLAST | (Conzelmann et al., 2013)
Pax1/9_Pox meso	Ptep_aug3.g22809.t1	aug3.g22809.t1 | LOC107455999	Parasteatoda tepidariorum	Ptep	Arthropoda, Chelicerata, Araneae, Entelegynae	i5k | Augustus_set_v3.0_proteins (Schwager et al. 2017)
Pax1/9_Pox meso	Ptep_aug3.g27336.t1	aug3.g27336.t1 | LOC107441569	Parasteatoda tepidariorum	Ptep	Arthropoda, Chelicerata, Araneae, Entelegynae	i5k | Augustus_set_v3.0_proteins (Schwager et al. 2017)
Pax1/9_Pox meso	Smim_Pax9_KFM71679.1	KFM71679.1	Stegodyphus mimosarum	Smim	Arthropoda, Chelicerata, Araneae, Entelegynae	NCBI
Pax1/9_Pox meso	Tcas_Poxmeso	XP_975478.1	Tribolium castaneum	Tcas	Arthropoda, Insecta, Coleoptera	NCBI
Pax1/9_Pox meso	Ttri_Unigene14820_ORF_8_fr2	Unigene14820_Trilobites	Tachypleus tridentatus	Ttri	Arthropoda, Chelicerata, Xiphosures	Local BLAST | (Liao et al., 2019)
Pax1/9_Pox meso	Ttri_Unigene37114_ORF_22_fr2	Unigene37114_Post-trilobites	Tachypleus tridentatus	Ttri	Arthropoda, Chelicerata, Xiphosures	Local BLAST | (Liao et al., 2019)
Pax2/5/8_shaven	Cgig_CGI_10024166	CGI_10024166	Crassostrea gigas	Cgig	Mollusca, Bivalvia	Local BLAST | http://mgbase.qnlm.ac/page/download/download (Liu et al., 2021)
Pax2/5/8_shaven	CSCU020632_PA	CSCU020632-PA | LOC111622751	Centruroides sculpturatus	Cscu	Arthropoda, Chelicerata, Scorpiones	i5k | Protein - Centruroides sculpturatus Maker proteins v0.5.3 (BCM) (Schwager et al. 2017)
Pax2/5/8_shaven	Dmel_shaven	Q59DN9	Drosophila melanogaster	Dmel	Arthropoda, Insecta, Diptera	Flybase & Uniprot
Pax2/5/8_shaven	Drer_Pax2A	XP_021336176.1	Danio rerio	Drer	Chordata, Vertebrata, Actinopterygii	NCBI
Pax2/5/8_shaven	Drer_Pax5	NP_571713.1	Danio rerio	Drer	Chordata, Vertebrata, Actinopterygii	NCBI
Pax2/5/8_shaven	Drer_Pax8	XP_017211892.1	Danio rerio	Drer	Chordata, Vertebrata, Actinopterygii	NCBI
Pax2/5/8_shaven	Dsil_comp19498	comp19498	Dysdera silvatica	Dsil	Arthropoda, Chelicerata, Araneae, Haplogynae	Local BLAST | Vizueta et al., 2017
Pax2/5/8_shaven	Dsil_comp21383	comp21383_1	Dysdera silvatica	Dsil	Arthropoda, Chelicerata, Araneae, Haplogynae	Local BLAST | Vizueta et al., 2017
Pax2/5/8_shaven	Ekan_c203847_g2_i10	c203847_g2_i10	Euperipatoides kanangrensis	Ekan	Onychophora	Local BLAST | R. Janssen Transcriptome
Pax2/5/8_shaven	Erow_Pax2	AJG44467.1	Euperipatoides rowelli	Erow	Onychophora	NCBI
Pax2/5/8_shaven	Gmar_c58338_g4_i7	c58338_g4_i7	Glomeris marginata	Gmar	Arthropoda, Myriapoda, Diplopoda	Local BLAST | R. Janssen Transcriptome
Pax2/5/8_shaven	Lgig_XP_009067285.1	XP_009067285.1	Lottia gigantea	Lgig	Mollusca, Gastropoda	Local BLAST | http://mgbase.qnlm.ac/page/download/download (Liu et al., 2021)
Pax2/5/8_shaven	Mmar_MMa31600	MMa31600	Mesobuthus martensii	Mmar	Arthropoda, Chelicerata, Scorpiones	Local BLAST | (Cao et al. 2013)
Pax2/5/8_shaven	Mmar_MMa39209	MMa39209	Mesobuthus martensii	Mmar	Arthropoda, Chelicerata, Scorpiones	Local BLAST | (Cao et al. 2013)
Pax2/5/8_shaven	Mmus_Pax2	sp|P32114.2|PAX2_MOUSE	Mus musculus	Mmus	Chordata, Vertebrata, Mammalia	NCBI
Pax2/5/8_shaven	Mmus_Pax5	NP_032808.1	Mus musculus	Mmus	Chordata, Vertebrata, Mammalia	NCBI
Pax2/5/8_shaven	Mmus_Pax8	AAN72308.1	Mus musculus	Mmus	Chordata, Vertebrata, Mammalia	NCBI
Pax2/5/8_shaven	Pdum11662	gnl|Pdu_trscr_assembly_1|11662;-0F	Platynereis dumerilii	Pdum	Annelida	Local BLAST | (Conzelmann et al., 2013)
Pax2/5/8_shaven	Ppha_c100802_g1_i8	c100802_g1_i8	Pholcus phalangioides	Ppha	Arthropoda, Chelicerata, Araneae, Haplogynae	Local BLAST | (Janssen et al. 2015 & Turetzek et al. in prep)
Pax2/5/8_shaven	Ppha_c56107_g1_i4	c56107_g1_i4	Pholcus phalangioides	Ppha	Arthropoda, Chelicerata, Araneae, Haplogynae	Local BLAST | (Janssen et al. 2015 & Turetzek et al. in prep)
Pax2/5/8_shaven	Ptep_aug3.g12456.t1	aug3.g12456.t1 | LOC107437595	Parasteatoda tepidariorum	Ptep	Arthropoda, Chelicerata, Araneae, Entelegynae	i5k | Augustus_set_v3.0_proteins (Schwager et al. 2017)
Pax2/5/8_shaven	Ptep_aug3.g762.t2	aug3.g762.t2 | LOC107444558	Parasteatoda tepidariorum	Ptep	Arthropoda, Chelicerata, Araneae, Entelegynae	i5k | Augustus_set_v3.0_proteins (Schwager et al. 2017)
Pax2/5/8_shaven	Smim_KFM62957.1	KFM62957.1	Stegodyphus mimosarum	Smim	Arthropoda, Chelicerata, Araneae, Entelegynae	NCBI
Pax2/5/8_shaven	Smim_KFM65422.1	KFM65422.1	Stegodyphus mimosarum	Smim	Arthropoda, Chelicerata, Araneae, Entelegynae	NCBI
Pax2/5/8_shaven	Tcas_shaven	KYB28704.1	Tribolium castaneum	Tcas	Arthropoda, Insecta, Coleoptera	NCBI
Pax2/5/8_shaven	Ttri_CL6022.Contig1_ORF_42_fr3	CL6022.Contig1_Pre-trilobites	Tachypleus tridentatus	Ttri	Arthropoda, Chelicerata, Xiphosures	Local BLAST | (Liao et al., 2019)
Pax2/5/8_shaven	Ttri_CL6022.Contig2_ORF_37_fr3	CL6022.Contig2_Pre-trilobites	Tachypleus tridentatus	Ttri	Arthropoda, Chelicerata, Xiphosures	Local BLAST | (Liao et al., 2019)
Pax2/5/8_shaven	Ttri_Unigene64163_ORF_3_fr2	Unigene64163_Post-trilobites	Tachypleus tridentatus	Ttri	Arthropoda, Chelicerata, Xiphosures	Local BLAST | (Liao et al., 2019)
Pax3/7_gooseberry	Agen_TRINITY_DN74244_c0_g1_i2	TRINITY_DN74244_c0_g1	Acanthoscurria geniculata	Agen	Arthropoda, Chelicerata, Araneae, Mygalomorphae	Local BLAST | (Pechmann 2020)
Pax3/7_gooseberry	Cgig_CGI_10026438	CGI_10026438	Crassostrea gigas	Cgig	Mollusca, Bivalvia	Local BLAST | http://mgbase.qnlm.ac/page/download/download (Liu et al., 2021)
Pax3/7_gooseberry	Csal_pairberry_CAG30843.1	CAG30843.1	Cupiennius salei	Csal	Arthropoda, Chelicerata, Araneae, Entelegynae	NCBI
Pax3/7_gooseberry	Csal_pairberry_CAG30844.1	CAG30844.1	Cupiennius salei	Csal	Arthropoda, Chelicerata, Araneae, Entelegynae	NCBI
Pax3/7_gooseberry	Csal_pairberry_CAG30845.1	CAG30845.1	Cupiennius salei	Csal	Arthropoda, Chelicerata, Araneae, Entelegynae	NCBI
Pax3/7_gooseberry	CSCU009125_PA	CSCU009125-PA | LOC111621559	Centruroides sculpturatus	Cscu	Arthropoda, Chelicerata, Scorpiones	i5k | Protein - Centruroides sculpturatus Maker proteins v0.5.3 (BCM) (Schwager et al. 2017)
Pax3/7_gooseberry	CSCU023561_PA	CSCU023561-PA | LOC111636166	Centruroides sculpturatus	Cscu	Arthropoda, Chelicerata, Scorpiones	i5k | Protein - Centruroides sculpturatus Maker proteins v0.5.3 (BCM) (Schwager et al. 2017)
Pax3/7_gooseberry	CSCU025884_PA	CSCU025884-PA | LOC111641518	Centruroides sculpturatus	Cscu	Arthropoda, Chelicerata, Scorpiones	i5k | Protein - Centruroides sculpturatus Maker proteins v0.5.3 (BCM) (Schwager et al. 2017)
Pax3/7_gooseberry	Dmel_gooseberry_neuro	NP_523862.1	Drosophila melanogaster	Dmel	Arthropoda, Insecta, Diptera	Flybase & Uniprot
Pax3/7_gooseberry	Drer_Pax7B	NP_001139621.1	Danio rerio	Drer	Chordata, Vertebrata, Actinopterygii	NCBI
Pax3/7_gooseberry	Dsil_comp37576	comp37576_1	Dysdera silvatica	Dsil	Arthropoda, Chelicerata, Araneae, Haplogynae	Local BLAST | Vizueta et al., 2017
Pax3/7_gooseberry	Ekan_c210176_g2_i1	c210176_g2_i1	Euperipatoides kanangrensis	Ekan	Onychophora	Local BLAST | R. Janssen Transcriptome
Pax3/7_gooseberry	Ekan_c210176_g2_i4	c210176_g2_i4	Euperipatoides kanangrensis	Ekan	Onychophora	Local BLAST | R. Janssen Transcriptome
Pax3/7_gooseberry	Erow_Pax3	AJG44469.1	Euperipatoides rowelli	Erow	Onychophora	NCBI
Pax3/7_gooseberry	Gmar_c52590_g1_i4	c52590_g1_i4	Glomeris marginata	Gmar	Arthropoda, Myriapoda, Diplopoda	Local BLAST | R. Janssen Transcriptome
Pax3/7_gooseberry	Gmar_c54270_g4_i1	c54270_g4_i1	Glomeris marginata	Gmar	Arthropoda, Myriapoda, Diplopoda	Local BLAST | R. Janssen Transcriptome
Pax3/7_gooseberry	Lgig_XP_009050791.1	XP_009050791.1	Lottia gigantea	Lgig	Mollusca, Gastropoda	Local BLAST | http://mgbase.qnlm.ac/page/download/download (Liu et al., 2021)
Pax3/7_gooseberry	LHES010140_PA	LHES010140-PA	Latrodectus hesperus	Lhes	Arthropoda, Chelicerata, Araneae, Entelegynae	i5k | Protein - LHES_new_ids.faa
Pax3/7_gooseberry	LHES013291_PA	LHES013291-PA	Latrodectus hesperus	Lhes	Arthropoda, Chelicerata, Araneae, Entelegynae	i5k | Protein - LHES_new_ids.faa
Pax3/7_gooseberry	LREC016330_PA	LREC016330-PA	Loxosceles reclusa	Lrec	Arthropoda, Chelicerata, Araneae, Haplogynae	i5k | Protein - LREC_new_ids.faa
Pax3/7_gooseberry	Mmar_MMa01417	MMa01417	Mesobuthus martensii	Mmar	Arthropoda, Chelicerata, Scorpiones	Local BLAST | (Cao et al. 2013)
Pax3/7_gooseberry	Mmar_MMa17217	MMa17217	Mesobuthus martensii	Mmar	Arthropoda, Chelicerata, Scorpiones	Local BLAST | (Cao et al. 2013)
Pax3/7_gooseberry	Mmus_Pax7	NP_035169.1	Mus musculus	Mmus	Chordata, Vertebrata, Mammalia	NCBI
Pax3/7_gooseberry	OFAS015111_PA	OFAS015111-PA	Oncopeltus fasciatus	Ofas	Arthropoda, Insecta, Hemiptera	i5k | Protein - Oncopeltus fasciatus OGSv1.2, peptides
Pax3/7_gooseberry	OFAS017189_PA	OFAS017189-PA	Oncopeltus fasciatus	Ofas	Arthropoda, Insecta, Hemiptera	i5k | Protein - Oncopeltus fasciatus OGSv1.2, peptides
Pax3/7_gooseberry	Pdum1964	gnl|Pdu_trscr_assembly_1|1964;-0F	Platynereis dumerilii	Pdum	Annelida	Local BLAST | (Conzelmann et al., 2013)
Pax3/7_gooseberry	Ppha_c113119_g1_i1	c113119_g1_i1	Pholcus phalangioides	Ppha	Arthropoda, Chelicerata, Araneae, Haplogynae	Local BLAST | (Janssen et al. 2015 & Turetzek et al. in prep)
Pax3/7_gooseberry	Ptep_aug3.g18397.t1	aug3.g18397.t1 | LOC107445228	Parasteatoda tepidariorum	Ptep	Arthropoda, Chelicerata, Araneae, Entelegynae	i5k | Augustus_set_v3.0_proteins (Schwager et al. 2017)
Pax3/7_gooseberry	Smim_KFM61913.1	KFM61913.1	Stegodyphus mimosarum	Smim	Arthropoda, Chelicerata, Araneae, Entelegynae	NCBI
Pax3/7_gooseberry	Smim_Pax7_KFM76871.1	KFM76871.1	Stegodyphus mimosarum	Smim	Arthropoda, Chelicerata, Araneae, Entelegynae	NCBI
Pax3/7_gooseberry	Tcas_gooseberry	XP_008197452.1	Tribolium castaneum	Tcas	Arthropoda, Insecta, Coleoptera	NCBI
Pax3/7_gooseberry	Tcas_gooseberry_neuro	XP_008197451.1	Tribolium castaneum	Tcas	Arthropoda, Insecta, Coleoptera	NCBI
Pax3/7_gooseberry	Ttri_Unigene11418_ORF_21_fr1	Unigene11418_Post-trilobites	Tachypleus tridentatus	Ttri	Arthropoda, Chelicerata, Xiphosures	Local BLAST | (Liao et al., 2019)
Pax6_eyeless	Agen_TRINITY_DN66522_c1_g1_i2	TRINITY_DN66522_c1_g1	Acanthoscurria geniculata	Agen	Arthropoda, Chelicerata, Araneae, Mygalomorphae	Local BLAST | (Pechmann 2020)
Pax6_eyeless	Agen_TRINITY_DN76100_c14_g1_i2	TRINITY_DN76100_c14_g1	Acanthoscurria geniculata	Agen	Arthropoda, Chelicerata, Araneae, Mygalomorphae	Local BLAST | (Pechmann 2020)
Pax6_eyeless	Cgig_CGI_10027695	CGI_10027695	Crassostrea gigas	Cgig	Mollusca, Bivalvia	Local BLAST | http://mgbase.qnlm.ac/page/download/download (Liu et al., 2021)
Pax6_eyeless	Csal_Pax6B_CEH19759.1	CEH19759.1	Cupiennius salei	Csal	Arthropoda, Chelicerata, Araneae, Entelegynae	NCBI
Pax6_eyeless	Csal_PaxA_CEH19758.1	CEH19758.1	Cupiennius salei	Csal	Arthropoda, Chelicerata, Araneae, Entelegynae	NCBI
Pax6_eyeless	CSCU004684_PA	CSCU004684-PA | LOC111619157	Centruroides sculpturatus	Cscu	Arthropoda, Chelicerata, Scorpiones	i5k | Protein - Centruroides sculpturatus Maker proteins v0.5.3 (BCM) (Schwager et al. 2017)
Pax6_eyeless	CSCU004691_PA	CSCU004691-PA | LOC111619160	Centruroides sculpturatus	Cscu	Arthropoda, Chelicerata, Scorpiones	i5k | Protein - Centruroides sculpturatus Maker proteins v0.5.3 (BCM) (Schwager et al. 2017)
Pax6_eyeless	CSCU004693_PA	CSCU004693-PA | LOC111619158	Centruroides sculpturatus	Cscu	Arthropoda, Chelicerata, Scorpiones	i5k | Protein - Centruroides sculpturatus Maker proteins v0.5.3 (BCM) (Schwager et al. 2017)
Pax6_eyeless	Dmel_Pax6	O18381	Drosophila melanogaster	Dmel	Arthropoda, Insecta, Diptera	Flybase & Uniprot
Pax6_eyeless	Dmel_toy	NP_001259080.1	Drosophila melanogaster	Dmel	Arthropoda, Insecta, Diptera	Flybase & Uniprot
Pax6_eyeless	Drer_Pax6B	XP_009301248.1	Danio rerio	Drer	Chordata, Vertebrata, Actinopterygii	NCBI
Pax6_eyeless	Dsil_comp125173	comp125173_1	Dysdera silvatica	Dsil	Arthropoda, Chelicerata, Araneae, Haplogynae	Local BLAST | Vizueta et al., 2017
Pax6_eyeless	Dsil_comp97215	comp97215_1	Dysdera silvatica	Dsil	Arthropoda, Chelicerata, Araneae, Haplogynae	Local BLAST | Vizueta et al., 2017
Pax6_eyeless	Ekan_c209761_g2_i6	c209761_g2_i6	Euperipatoides kanangrensis	Ekan	Onychophora	Local BLAST | R. Janssen Transcriptome
Pax6_eyeless	Erow_Pax6	AJG44470.1	Euperipatoides rowelli	Erow	Onychophora	NCBI
Pax6_eyeless	Gmar_c59242_g2_i5	c59242_g2_i5	Glomeris marginata	Gmar	Arthropoda, Myriapoda, Diplopoda	Local BLAST | R. Janssen Transcriptome
Pax6_eyeless	Lgig_XP_009066032.1	XP_009066032.1	Lottia gigantea	Lgig	Mollusca, Gastropoda	Local BLAST | http://mgbase.qnlm.ac/page/download/download (Liu et al., 2021)
Pax6_eyeless	LHES007206_PA	LHES007206-PA	Latrodectus hesperus	Lhes	Arthropoda, Chelicerata, Araneae, Entelegynae	i5k | Protein - LHES_new_ids.faa
Pax6_eyeless	LREC007189_PA	LREC007189-PA	Loxosceles reclusa	Lrec	Arthropoda, Chelicerata, Araneae, Haplogynae	i5k | Protein - LREC_new_ids.faa
Pax6_eyeless	LREC016936_PA	LREC016936-PA	Loxosceles reclusa	Lrec	Arthropoda, Chelicerata, Araneae, Haplogynae	i5k | Protein - LREC_new_ids.faa
Pax6_eyeless	Mmar_MMa26910	MMa26910	Mesobuthus martensii	Mmar	Arthropoda, Chelicerata, Scorpiones	Local BLAST | (Cao et al. 2013)
Pax6_eyeless	Mmar_MMa29056	MMa29056	Mesobuthus martensii	Mmar	Arthropoda, Chelicerata, Scorpiones	Local BLAST | (Cao et al. 2013)
Pax6_eyeless	Mmar_MMa29057	MMa29057	Mesobuthus martensii	Mmar	Arthropoda, Chelicerata, Scorpiones	Local BLAST | (Cao et al. 2013)
Pax6_eyeless	Mmus_Pax6	NP_001231127.1	Mus musculus	Mmus	Chordata, Vertebrata, Mammalia	NCBI
Pax6_eyeless	OFAS003935_PA	OFAS003935-PA	Oncopeltus fasciatus	Ofas	Arthropoda, Insecta, Hemiptera	i5k | Protein - Oncopeltus fasciatus OGSv1.2, peptides
Pax6_eyeless	OFAS009067_PA	OFAS009067-PA	Oncopeltus fasciatus	Ofas	Arthropoda, Insecta, Hemiptera	i5k | Protein - Oncopeltus fasciatus OGSv1.2, peptides
Pax6_eyeless	Pdum272593	gnl|Pdu_trscr_assembly_1|272593;-0F	Platynereis dumerilii	Pdum	Annelida	Local BLAST | (Conzelmann et al., 2013)
Pax6_eyeless	Ppha_c100812_g8_i1	c100812_g8_i1	Pholcus phalangioides	Ppha	Arthropoda, Chelicerata, Araneae, Haplogynae	Local BLAST | (Janssen et al. 2015 & Turetzek et al. in prep)
Pax6_eyeless	Ppha_c112264_g2_i1	c112264_g2_i1	Pholcus phalangioides	Ppha	Arthropoda, Chelicerata, Araneae, Haplogynae	Local BLAST | (Janssen et al. 2015 & Turetzek et al. in prep)
Pax6_eyeless	Ptep_aug3.g11688.t1	aug3.g11688.t1 | LOC107436595	Parasteatoda tepidariorum	Ptep	Arthropoda, Chelicerata, Araneae, Entelegynae	i5k | Augustus_set_v3.0_proteins (Schwager et al. 2017)
Pax6_eyeless	Ptep_aug3.g19451.t1	aug3.g19451.t1 | LOC107441893	Parasteatoda tepidariorum	Ptep	Arthropoda, Chelicerata, Araneae, Entelegynae	i5k | Augustus_set_v3.0_proteins (Schwager et al. 2017)
Pax6_eyeless	Ptep_Pax6.1_FM945394.1	FM945394.1	Parasteatoda tepidariorum	Ptep	Arthropoda, Chelicerata, Araneae, Entelegynae	NCBI
Pax6_eyeless	Tcas_Pax6	XP_008192127.1	Tribolium castaneum	Tcas	Arthropoda, Insecta, Coleoptera	NCBI
Pax6_eyeless	Tcas_Pax6_like	KYB27994.1	Tribolium castaneum	Tcas	Arthropoda, Insecta, Coleoptera	NCBI
Pax6_eyeless	Tcas_TC007409	TC007409	Tribolium castaneum	Tcas	Arthropoda, Insecta, Coleoptera	NCBI
Pax6_eyeless	Tcas_TC032830	TC032830	Tribolium castaneum	Tcas	Arthropoda, Insecta, Coleoptera	NCBI
Pax6_eyeless	Ttri_CL3230.Contig1_ORF_23_fr3	CL3230.Contig1_Pre-trilobites	Tachypleus tridentatus	Ttri	Arthropoda, Chelicerata, Xiphosures	Local BLAST | (Liao et al., 2019)
Pax6_eyeless	Ttri_CL3230.Contig3_ORF_30_fr3	CL3230.Contig3_Pre-trilobites	Tachypleus tridentatus	Ttri	Arthropoda, Chelicerata, Xiphosures	Local BLAST | (Liao et al., 2019)
Pax6_eyeless	Ttri_Unigene13285_ORF_2_fr1	Unigene13285_Pre-trilobites	Tachypleus tridentatus	Ttri	Arthropoda, Chelicerata, Xiphosures	Local BLAST | (Liao et al., 2019)
Paxα	Cgig_CGI_10022161	CGI_10022161	Crassostrea gigas	Cgig	Mollusca, Bivalvia	Local BLAST | http://mgbase.qnlm.ac/page/download/download (Liu et al., 2021)
Paxα	Ekan_c189872_g1_i2	c189872_g1_i2	Euperipatoides kanangrensis	Ekan	Onychophora	Local BLAST | R. Janssen Transcriptome
Paxα	Erow_Pax_alpha	AJG44471.1	Euperipatoides rowelli	Erow	Onychophora	NCBI
Paxα	Lgig_XP_009050008.1	XP_009050008.1	Lottia gigantea	Lgig	Mollusca, Gastropoda	Local BLAST | http://mgbase.qnlm.ac/page/download/download (Liu et al., 2021)
Paxα	LHES013634_PA	LHES013634-PA	Latrodectus hesperus	Lhes	Arthropoda, Chelicerata, Araneae, Entelegynae	i5k | Protein - LHES_new_ids.faa
Paxα	Ppha_c2327_g1_i2	c2327_g1_i2	Pholcus phalangioides	Ppha	Arthropoda, Chelicerata, Araneae, Haplogynae	Local BLAST | (Janssen et al. 2015 & Turetzek et al. in prep)
Paxα	Ptep_aug3.g8968.t2	aug3.g8968.t2 | LOC107456976	Parasteatoda tepidariorum	Ptep	Arthropoda, Chelicerata, Araneae, Entelegynae	i5k | Augustus_set_v3.0_proteins (Schwager et al. 2017)
Paxα	Ptep_Pax6.2	KP725068.1	Parasteatoda tepidariorum	Ptep	Arthropoda, Chelicerata, Araneae, Entelegynae	NCBI
Pox neuro	Cgig_CGI_10012686	CGI_10012686	Crassostrea gigas	Cgig	Mollusca, Bivalvia	Local BLAST | http://mgbase.qnlm.ac/page/download/download (Liu et al., 2021)
Pox neuro	CSCU008551_PA	CSCU008551-PA | LOC111620677	Centruroides sculpturatus	Cscu	Arthropoda, Chelicerata, Scorpiones	i5k | Protein - Centruroides sculpturatus Maker proteins v0.5.3 (BCM) (Schwager et al. 2017)
Pox neuro	Dmel_Poxneuro	P23758	Drosophila melanogaster	Dmel	Arthropoda, Insecta, Diptera	Flybase & Uniprot
Pox neuro	Ekan_c200441_g2_i1	c200441_g2_i1	Euperipatoides kanangrensis	Ekan	Onychophora	Local BLAST | R. Janssen Transcriptome
Pox neuro	Erow_Pox_neuro	AJG44468.1	Euperipatoides rowelli	Erow	Onychophora	NCBI
Pox neuro	Gmar_c58828_g1_i1	c58828_g1_i1	Glomeris marginata	Gmar	Arthropoda, Myriapoda, Diplopoda	Local BLAST | R. Janssen Transcriptome
Pox neuro	Lgig_XP_009064149.1	XP_009064149.1	Lottia gigantea	Lgig	Mollusca, Gastropoda	Local BLAST | http://mgbase.qnlm.ac/page/download/download (Liu et al., 2021)
Pox neuro	LREC015628_PA	LREC015628-PA	Loxosceles reclusa	Lrec	Arthropoda, Chelicerata, Araneae, Haplogynae	i5k | Protein - LREC_new_ids.faa
Pox neuro	Mmar_MMa28338	MMa28338	Mesobuthus martensii	Mmar	Arthropoda, Chelicerata, Scorpiones	Local BLAST | (Cao et al. 2013)
Pox neuro	Pdum19383	gnl|Pdu_trscr_assembly_1|19383;-0F	Platynereis dumerilii	Pdum	Annelida	Local BLAST | (Conzelmann et al., 2013)
Pox neuro	Ppha_c69834_g1_i1	c69834_g1_i1	Pholcus phalangioides	Ppha	Arthropoda, Chelicerata, Araneae, Haplogynae	Local BLAST | (Janssen et al. 2015 & Turetzek et al. in prep)
Pox neuro	Ptep_aug3.g26228.t1	aug3.g26228.t1 | LOC107437326	Parasteatoda tepidariorum	Ptep	Arthropoda, Chelicerata, Araneae, Entelegynae	i5k | Augustus_set_v3.0_proteins (Schwager et al. 2017)
Pox neuro	Tcas_KYB26546.1	KYB26546.1	Tribolium castaneum	Tcas	Arthropoda, Insecta, Coleoptera	NCBI

## Sheet: PAX65
Gene Identity	Name	Accession number/Transcript ID	Full Species Name	Short Code	Systematic Classification	Source
Pax2.1 | Pax2/5/8	Pp_c100802	c100802_g1_i8	Pholcus phalangioides	Ppha	Arthropoda, Chelicerata, Araneae, Haplogynae	Local BLAST | (Janssen et al. 2015 & Turetzek et al. in prep)
Pax2.1 | Pax2/5/8	Dsil_comp21383	comp21383	Dysdera silvatica	Dsil	Arthropoda, Chelicerata, Araneae, Haplogynae	Local BLAST | Vizueta et al., 2017
Pax2.1 | Pax2/5/8	GBM54139.1	GBM54139.1	Araneus ventricosus	GBM	Arthropoda, Chelicerata, Araneae, Entelegynae	(Kono et al. 2019)
Pax2.1 | Pax2/5/8	Ab_g13202	Ab_g13202	Argiope bruennichi	Ab	Arthropoda, Chelicerata, Araneae, Entelegynae	(Scheffer et al. 2021)
Pax2.1 | Pax2/5/8	Ptep_aug3.g762.t2	aug3.g762.t2 | LOC107444558	Parasteatoda tepidariorum	Ptep	Arthropoda, Chelicerata, Araneae, Entelegynae	i5k | Augustus_set_v3.0_proteins (Schwager et al. 2017)
Pax2.1 | Pax2/5/8	Smim_KFM62957.1	KFM62957.1	Stegodyphus mimosarum	Smim	Arthropoda, Chelicerata, Araneae, Entelegynae	NCBI
Pax2.1 | Pax2/5/8	Sdum_XP_035211749.1	XP_035211749.1	Stegodyphus dumicola	Sdum	Arthropoda, Chelicerata, Araneae, Entelegynae	(Liu et al. 2019)
Pax2.1 | Pax2/5/8	Lpol_XM_013920080.1	XM_013920080.1	Limulus polyphemus	Lpol	Arthropoda, Chelicerata, Xiphosura	NCBI
Pax2.1 | Pax2/5/8	Mmar_MMa39209	MMa39209	Mesobuthus martensii	Mmar	Arthropoda, Chelicerata, Scorpiones	Cao et al. 2018
Pax2.1 | Pax2/5/8	CSCU020632	CSCU020632 | LOC111622751	Centruroides sculpturatus	Cscu	Arthropoda, Chelicerata, Scorpiones	i5k | Protein - Centruroides sculpturatus Maker proteins v0.5.3 (BCM) (Schwager et al. 2017)
Pax2.2 | Pax2/5/8	Lpol_XM_013929420.1	XM_013929420.1	Limulus polyphemus	Lpol	Arthropoda, Chelicerata, Xiphosura	NCBI
Pax2.2 | Pax2/5/8	Ttri_Unigene64163_ORF_3_fr2	Unigene64163_ORF_3_fr2	Tachypleus tridentatus	Ttri	Arthropoda, Chelicerata, Xiphosura	Local BLAST (Liao et al. 2019)
Pax2.2 | Pax2/5/8	Lpol_XM_013917411.1	XM_013917411.1	Limulus polyphemus	Lpol	Arthropoda, Chelicerata, Xiphosura	NCBI
Pax2.2 | Pax2/5/8	Lpol_XM_013925118.1	XM_013925118.1	Limulus polyphemus	Lpol	Arthropoda, Chelicerata, Xiphosura	NCBI
Pax2.2 | Pax2/5/8	Lpol_XM_013921316.1	XM_013921316.1	Limulus polyphemus	Lpol	Arthropoda, Chelicerata, Xiphosura	NCBI
Pax2.2 | Pax2/5/8	Ttri_CL6022.Contig1_ORF_42_fr3	CL6022.Contig1_ORF_42_fr3	Tachypleus tridentatus	Ttri	Arthropoda, Chelicerata, Xiphosura	Local BLAST (Liao et al. 2019)
Pax2.2 | Pax2/5/8	Ttri_CL6022.Contig2_ORF_37_fr3	CL6022.Contig2_ORF_37_fr3	Tachypleus tridentatus	Ttri	Arthropoda, Chelicerata, Xiphosura	Local BLAST (Liao et al. 2019)
Pax2.2 | Pax2/5/8	Mmar_MMa31600	MMa31600	Mesobuthus martensii	Mmar	Arthropoda, Chelicerata, Scorpiones	Cao et al. 2017
Pax2.2 | Pax2/5/8	GBM94369.1	GBM94369.1	Araneus ventricosus	GBM	Arthropoda, Chelicerata, Araneae, Entelegynae	(Kono et al. 2019)
Pax2.2 | Pax2/5/8	Ab_g23033	Ab_g23033	Argiope bruennichi	Ab	Arthropoda, Chelicerata, Araneae, Entelegynae	(Scheffer et al. 2021)
Pax2.2 | Pax2/5/8	Sdum_XP_035224352.1	XP_035224352.1	Stegodyphus dumicola	Sdum	Arthropoda, Chelicerata, Araneae, Entelegynae	(Liu et al. 2019)
Pax2.2 | Pax2/5/8	Smim_KFM65422.1	KFM65422.1	Stegodyphus mimosarum	Smim	Arthropoda, Chelicerata, Araneae, Entelegynae	NCBI
Pax2.2 | Pax2/5/8	Ptep_aug3.g12456.t1	Ptep_aug3.g12456.t1 | LOC107437595	Parasteatoda tepidariorum	Ptep	Arthropoda, Chelicerata, Araneae, Entelegynae	i5k | Augustus_set_v3.0_proteins (Schwager et al. 2017)
Pax2.2 | Pax2/5/8	Dsil_comp19498	comp19498	Dysdera silvatica	Dsil	Arthropoda, Chelicerata, Araneae, Haplogynae	Local BLAST | Vizueta et al., 2017
Pax2.2 | Pax2/5/8	Ppha_c56107	c56107_g1_i4	Pholcus phalangioides	Ppha	Arthropoda, Chelicerata, Araneae, Haplogynae	(Janssen et al. 2015 & Turetzek et al. in prep)
Pax2/5/8	Dmel_sv	Q59DN9	Drosophila melanogaster	Dmel	Arthropoda, Insecta, Diptera	Flybase & Uniprot
Pax2/5/8	Tcas_sv	KYB28704.1	Tribolium castaneum	Tcas	Arthropoda, Insecta, Coleoptera	NCBI
Pax2/5/8	Erow_Pax2	AJG44467.1	Euperipatoides rowelli	Erow	Onychophora	NCBI
Pax2/5/8	Vdes_XP_022672742.1	XP_022672742.1	Varroa destructor	Vdes	Arthropoda, Chelicerata, Acari	NCBI
Pax2/5/8	Mmus_Pax5	NP_032808.1	Mus musculus	Mmus	Chordata, Vertebrata, Mammalia	NCBI
Pax2/5/8	Drer_Pax2A	XP_021336176.1	Danio rerio	Drer	Chordata, Vertebrata, Actinopterygii	NCBI
Pax2/5/8	Drer_Pax5	NP_571713.1	Danio rerio	Drer	Chordata, Vertebrata, Actinopterygii	NCBI
Pax2/5/8	Drer_Pax8	XP_017211892.1	Danio rerio	Drer	Chordata, Vertebrata, Actinopterygii	NCBI
Pax2/5/8	Mmus_Pax2	P32114.2	Mus musculus	Mmus	Chordata, Vertebrata, Mammalia	NCBI
Pax2/5/8	Mmus_Pax8	AAN72308.1	Mus musculus	Mmus	Chordata, Vertebrata, Mammalia	NCBI
Pax6_eyeless	CSCU004691	CSCU004691	Centruroides sculpturatus	Cscu	Arthropoda, Chelicerata, Scorpiones	i5k | Protein - Centruroides sculpturatus Maker proteins v0.5.3 (BCM) (Schwager et al. 2017)
Pax6_eyeless	CSCU004693	CSCU004693	Centruroides sculpturatus	Cscu	Arthropoda, Chelicerata, Scorpiones	i5k | Protein - Centruroides sculpturatus Maker proteins v0.5.3 (BCM) (Schwager et al. 2017)
Pax6_eyeless	Mmar_MMa26910	Mmar_MMa26910	Mesobuthus martensii	Mmar	Arthropoda, Chelicerata, Scorpiones	Local BLAST | (Cao et al. 2013)
Pax6_eyeless	Ptep_aug3.g11688.t1	aug3.g11688.t1 | LOC107436595	Parasteatoda tepidariorum	Ptep	Arthropoda, Chelicerata, Araneae, Entelegynae	i5k | Augustus_set_v3.0_proteins (Schwager et al. 2017)
Pax6_eyeless	Ppha_c112264	c112264_g2_i1	Pholcus phalangioides	Ppha	Arthropoda, Chelicerata, Araneae, Haplogynae	Local BLAST | (Janssen et al. 2015 & Turetzek et al. in prep)
Pax6_eyeless	Csal_PaxA	CEH19758.1	Cupiennius salei	Csal	Arthropoda, Chelicerata, Araneae, Entelegynae	NCBI
Pax6_eyeless	Erow_Pax6	Erow_Pax6_AJG44470.1	Euperipatoides rowelli	Erow	Onychophora	NCBI
Pax6_eyeless	Drer_Pax6	XP_009301248.1	Danio rerio	Drer	Chordata, Vertebrata, Actinopterygii	NCBI
Pax6_eyeless	Mmus_Pax6	NP_001231127.1	Mus musculus	Mmus	Chordata, Vertebrata, Mammalia	NCBI
Pax6_eyeless	Dmel_Pax6	O18381	Drosophila melanogaster	Dmel	Arthropoda, Insecta, Diptera	Flybase & Uniprot
Pax6_eyeless	Tcas_Pax6	XP_008192127.1	Tribolium castaneum	Tcas	Arthropoda, Insecta, Coleoptera	NCBI
Pax6_eyeless	MMa29056	MMa29056	Mesobuthus martensii	Mmar	Arthropoda, Chelicerata, Scorpiones	Local BLAST | (Cao et al. 2013)
Pax6_eyeless	Ppha_c100812	c100812_g8_i1	Pholcus phalangioides	Ppha	Arthropoda, Chelicerata, Araneae, Haplogynae	(Janssen et al. 2015 & Turetzek et al. in prep)
Pax6_eyeless	Ptep_aug3.g19451	aug3.g19451.t1 | LOC107441893	Parasteatoda tepidariorum	Ptep	Arthropoda, Chelicerata, Araneae, Entelegynae	i5k | Augustus_set_v3.0_proteins (Schwager et al. 2017)
Pax6_eyeless	Csal_Pax6B	CEH19759.1	Cupiennius salei	Csal	Arthropoda, Chelicerata, Araneae, Entelegynae	NCBI
Pax6_eyeless	Dmel_toy	NP_001259080.1	Drosophila melanogaster	Dmel	Arthropoda, Insecta, Diptera	Flybase & Uniprot
Pax6_eyeless	Tcas_Pax6	KYB27994.1	Tribolium castaneum	Tcas	Arthropoda, Insecta, Coleoptera	NCBI
Pax6_eyeless	CSCU004684	CSCU004684	Centruroides sculpturatus	Cscu	Arthropoda, Chelicerata, Scorpiones	i5k | Protein - Centruroides sculpturatus Maker proteins v0.5.3 (BCM) (Schwager et al. 2017)
Pax6_eyeless	Mmar_MMa29057	MMa29057	Mesobuthus martensii	Mmar	Arthropoda, Chelicerata, Scorpiones	Local BLAST | (Cao et al. 2013)
Pox neuro	Erow_Poxn	AJG44468.1	Euperipatoides rowelli	Erow	Onychophora	NCBI
Pox neuro	Ab_g2988	Ab_g2988	Argiope bruennichi	Ab	Arthropoda, Chelicerata, Araneae, Entelegynae	(Scheffer et al. 2021)
Pox neuro	GBM39975.1	GBM39975.1	Araneus ventricosus	GBM	Arthropoda, Chelicerata, Araneae, Entelegynae	(Kono et al. 2019)
Pox neuro	CSCU008551_PA	CSCU008551-PA | LOC111620677	Centruroides sculpturatus	Cscu	Arthropoda, Chelicerata, Scorpiones	i5k | Protein - Centruroides sculpturatus Maker proteins v0.5.3 (BCM) (Schwager et al. 2017)
Pox neuro	Mmar_MMa28338	MMa28338	Mesobuthus martensii	Mmar	Arthropoda, Chelicerata, Scorpiones	Cao et al. 2014
Pox neuro	Ptep_aug3.g26228.t1	aug3.g26228.t1 | LOC107437326	Parasteatoda tepidariorum	Ptep	Arthropoda, Chelicerata, Araneae, Entelegynae	i5k | Augustus_set_v3.0_proteins (Schwager et al. 2017)
Pox neuro	LREC015628	LREC015628-PA	Loxosceles reclusa	Lrec	Arthropoda, Chelicerata, Araneae, Haplogynae	i5k | Protein - LREC_new_ids.faa
Pox neuro	Ppha_c69834	c69834_g1_i1	Pholcus phalangioides	Ppha	Arthropoda, Chelicerata, Araneae, Haplogynae	Local BLAST |(Janssen et al. 2015 & Turetzek et al. in prep)
Pox neuro	Lpol_XM_013921772.1	XM_013921772.1	Limulus polyphemus	Lpol	Arthropoda, Chelicerata, Xiphosura	NCBI
Pox neuro	Dmel_Poxn	P23758	Drosophila melanogaster	Dmel	Arthropoda, Insecta, Diptera	Flybase & Uniprot
Pox neuro	Tcas_poxn	KYB26546.1	Tribolium castaneum	Tcas	Arthropoda, Insecta, Coleoptera	NCBI
